# Supplementary material for: Mechanical control of global cell behaviour during dorsal closure inDrosophila
Source: Oxford University Press journal article supplement (doi:10.1242/dev.030866), 2009-04-30
Supplement: dev030866tables1.pdf [file dev030866tables1.pdf]

**Table S1. Number of extruded cells during dorsal closure**

| Genotype           | Number of AS cells | Number of extruded cells | % Extruded cells |
|--------------------|--------------------|--------------------------|------------------|
| ubiECadGFP         | 174                | 19                       | 11               |
|                    | 194                | 14                       | 7                |
|                    | 161                | 13                       | 8                |
|                    | 198                | 16                       | 8                |
| enGal4/UAS-spastin | 148                | 13                       | 9                |
|                    | 149                | 12                       | 8                |
|                    | 171                | 12                       | 7                |
|                    | 167                | 12                       | 7                |
| ASGal4/UAS-p35     | 233                | 0                        | 0                |
|                    | 233                | 0                        | 0                |
|                    | 251                | 0                        | 0                |
| <i>mys</i>         | 224                | 17                       | 8                |
|                    | 218                | 30                       | 14               |
|                    | 228                | 16                       | 7                |
|                    | 242                | 20                       | 8                |

The total number of cells at the onset of dorsal closure (DC) and the number of extruded cells are indicated for the embryos analysed. There are no significant differences in the percentage of extruded cells between wild-type and enGal4/UAS-spastin embryos ( $t=0.758$ ,  $df=6$ ,  $P=0.48$ ), nor between wild-type and *mys* embryos ( $t=0.412$ ,  $df=6$ ,  $P=0.69$ ).
